# Supplementary material for: Hierarchical Post-transcriptional Regulation of Colicin E2 Expression in Escherichia coli
Source: PLOS journal article supplement (doi:10.1371/journal.pcbi.1005243), 2016-12-15
Supplement: S1 (10.1371/journal.pcbi.1005243.s001) [file journal.pcbi.1005243.s001.pdf › journal.pcbi.1005243.s001.pdf]

| <b>Description</b>                                                      | <b>Rate</b>        | <b>Parameter</b> | <b>Literature</b> | <b>Estimates</b> |
|-------------------------------------------------------------------------|--------------------|------------------|-------------------|------------------|
| Lumped effective transcription and translation rate of CsrA dimers      | $\beta_A$          | $\beta_A$        | -                 | 58.52            |
| Transcription rate of the effective sRNA                                | $\alpha_S$         | $\alpha_S$       | -                 | 57.5             |
| Degradation rate of short mRNA                                          | $\delta_{M_s} M_s$ | $\delta_{M_s}$   | 0.04              | -                |
| Degradation rate of long mRNA                                           | $\delta_M M$       | $\delta_M$       | 0.04              | -                |
| Degradation rate of CsrA dimers                                         | $\delta_A A$       | $\delta_A$       | 0.00007           | -                |
| Degradation rate of effective sRNA                                      | $\delta_S S$       | $\delta_S$       | 0.023             | -                |
| Coupled degradation rate of long mRNA with CsrA dimers                  | $k_M M A$          | $k_M$            | -                 | 0.5              |
| Coupled degradation rate of effective sRNA with CsrA dimers             | $k_S A S$          | $k_S$            | -                 | 0.5              |
| Probability of CsrA dimers surviving degradation of sRNA-CsrA complexes | $1 - p_M$          | -                | 0                 | -                |
| Probability of CsrA dimers surviving degradation of mRNA-CsrA complexes | $1 - p_S$          | -                | 0                 | -                |
