# Supplementary material for: Hierarchical Post-transcriptional Regulation of Colicin E2 Expression in Escherichia coli
Source: PLOS journal article supplement (doi:10.1371/journal.pcbi.1005243), 2016-12-15
Supplement: S2 (10.1371/journal.pcbi.1005243.s002) [file journal.pcbi.1005243.s002.pdf › journal.pcbi.1005243.s002.pdf]

| Description                                                   | Rate                              | Parameter      | Literature | Estimates |
|---------------------------------------------------------------|-----------------------------------|----------------|------------|-----------|
| Transcription rate of <i>recA</i> mRNA                        | $\alpha_{M_r}(1 - B_r)$           | $\alpha_{M_r}$ | 3.0        | -         |
| Transcription rate of <i>lexA</i> mRNA                        | $\alpha_{M_l}(1 - B_l)$           | $\alpha_{M_l}$ | 1.8        | -         |
| Translation rate of RecA protein                              | $\beta_R M_r$                     | $\beta_R$      | 2.4        | -         |
| Translation rate of LexA protein                              | $\beta_{Le} M_l$                  | $\beta_{Le}$   | 6.0        | -         |
| Degradation rate of <i>recA</i> mRNA                          | $\delta_{M_r} M_r$                | $\delta_{M_r}$ | 1.2        | -         |
| Degradation rate of <i>lexA</i> mRNA                          | $\delta_{M_l} M_l$                | $\delta_{M_l}$ | 0.18       | -         |
| Degradation rate of RecA protein                              | $\delta_R R$                      | $\delta_R$     | 1.2        | -         |
| Degradation rate of LexA protein                              | $\beta_{Le} Le$                   | $\beta_{Le}$   | 0.12       | -         |
| Binding rate of LexA dimers to <i>recA</i> promoter sites     | $k_r^+(1 - B_r)Le$                | $k_r^+$        | 1.2        | -         |
| Binding rate of LexA dimers to <i>lexA</i> promoter sites     | $k_l^+(1 - B_l)Le$                | $k_l^+$        | 0.6        | -         |
| Unbinding rate of LexA dimers from <i>recA</i> promoter sites | $k_r^- B_r$                       | $k_r^-$        | 2.4        | -         |
| Unbinding rate of LexA dimers from <i>lexA</i> promoter sites | $k_l^- B_l$                       | $k_l^-$        | 0.6        | -         |
| Rate of LexA auto-cleavage due to RecA protein                | $c_p R Le$                        | $c_p$          | -          | 0-6       |
| Binding rate of LexA dimers to SOS promoter sites             | $k_{sos}^+(1 - B_{sos})Le$        | $k_{sos}^+$    | -          | 1.2       |
| Unbinding rate of LexA dimers from SOS promoter sites         | $k_{sos}^- B_{sos}$               | $k_{sos}^-$    | -          | 1.2       |
| Transcription rate of short mRNA                              | $\alpha_{M_s}(n_{sos} - B_{sos})$ | $\alpha_{M_s}$ | -          | 1.0       |
| Transcription rate of long mRNA                               | $\alpha_{M_l}(n_{sos} - B_{sos})$ | $\alpha_{M_l}$ | -          | 1.0       |
